# Supplementary material for: Impact of surgical complications on hospital costs and revenues: retrospective database study of Medicare claims
Source: Atypon-hosted journal article supplement (doi:10.57264/cer-2023-0080), 2023-06-23
Supplement: supplementary tables.xlsx [file supplementary%20tables.xlsx]

## Sheet: TA1 Covariates
Table A1. Summary of covariates, full dataset and matched dataset.
	Full & Matched Dataset	Full Dataset			Matched Dataset
Continuous Variables
	Complications, mean	No Complications, mean	Mean Diff. (CI)	P-Value	No Complications, mean	Mean Diff. (CI)	SMD	P-Value
Age	76.143	73.5982	2.54 (2.13, 2.96)	< 0.01	76.4355	-0.29 (-0.87, 0.28)	-0.027	0.32
Elixhauser comorbidity index (mortality)	10.5812	1.81286	8.77 (8.19, 9.35)	< 0.01	10.3054	0.28 (-0.52, 1.08)	0.019	0.5
Elixhauser comorbidity index (30-day re-admission)	10.3414	4.85326	5.49 (5.18, 5.80)	< 0.01	10.3312	0.01 (-0.42, 0.45)	0.001	0.96
Elixhauser comorbidity count	3.79894	2.62083	1.18 (1.11, 1.25)	< 0.01	3.82284	-0.02 (-0.13, 0.08)	-0.012	0.65
Patient demographics
	Complications, n (%)	No Complications, n (%)	Odds Ratio (CI)	P-Value	No Complications, n (%)	Odds Ratio (CI)	SMD	P-Value
Female	1,422 (53.95%)	44,323 (62.02%)	0.72 (0.66, 0.78)	< 0.01	1,412 (53.57%)	1.02 (0.91, 1.13)	0.008	0.8
Male	1,214 (46.05%)	27,144 (37.98%)	1.39 (1.29, 1.51)	< 0.01	1,224 (46.43%)	0.98 (0.88, 1.10)	-0.008	0.8
0-64	247 (9.37%)	7,532 (10.54%)	0.88 (0.77, 1.00)	0.06	231 (8.76%)	1.08 (0.89, 1.30)	0.021	0.47
65-69	368 (13.96%)	14,791 (20.7%)	0.62 (0.56, 0.70)	< 0.01	351 (13.32%)	1.06 (0.90, 1.24)	0.019	0.52
70-74	461 (17.49%)	14,788 (20.69%)	0.81 (0.73, 0.90)	< 0.01	451 (17.11%)	1.03 (0.89, 1.18)	0.010	0.74
75-79	467 (17.72%)	12,840 (17.97%)	0.98 (0.89, 1.09)	0.76	477 (18.1%)	0.97 (0.85, 1.12)	-0.010	0.75
80-84	435 (16.5%)	9,950 (13.92%)	1.22 (1.10, 1.36)	< 0.01	426 (16.16%)	1.03 (0.89, 1.19)	0.009	0.77
85+	658 (24.96%)	11,566 (16.18%)	1.72 (1.57, 1.89)	< 0.01	700 (26.56%)	0.92 (0.81, 1.04)	-0.036	0.2
Hospitalization
	Complications, n (%)	No Complications, n (%)	Odds Ratio (CI)	P-Value	No Complications, n (%)	Odds Ratio (CI)	SMD	P-Value
Urgent	1,934 (73.37%)	32,722 (45.79%)	3.26 (2.99, 3.56)	< 0.01	1,957 (74.24%)	0.96 (0.85, 1.08)	-0.020	0.49
Elective	697 (26.44%)	38,652 (54.08%)	0.31 (0.28, 0.33)	< 0.01	677 (25.68%)	1.04 (0.92, 1.18)	0.017	0.55
Unknown	.	.	1.46 (0.59, 3.59)	0.4	.	2.50 (0.49, 12.91)	0.031	0.45
Procedure
	Complications, n (%)	No Complications, n (%)	Odds Ratio (CI)	P-Value	No Complications, n (%)	Odds Ratio	SMD	P-Value
Cholecystectomy	535 (20.3%)	13,371 (18.71%)	1.11 (1.00, 1.22)	0.04	535 (20.3%)	1	0	1
Colorectal resection	1,013 (38.43%)	11,125 (15.57%)	3.39 (3.12, 3.67)	< 0.01	1,013 (38.43%)	1	0	1
Hip replacement	915 (34.71%)	37,784 (52.87%)	0.47 (0.44, 0.51)	< 0.01	915 (34.71%)	1	0	1
Hysterectomy	88 (3.34%)	3,013 (4.22%)	0.78 (0.63, 0.97)	0.03	88 (3.34%)	1	0	1
Knee arthroplasty	85 (3.22%)	6,174 (8.64%)	0.35 (0.28, 0.44)	< 0.01	85 (3.22%)	1	0	1
Colorectal resection (open)	856 (32.47%)	6,614 (9.25%)	4.72 (4.33, 5.14)	< 0.01	856 (32.47%)	1	0	1
Cholecystectomy (open)	122 (4.63%)	1,436 (2.01%)	2.37 (1.96, 2.86)	< 0.01	122 (4.63%)	1	0	1
Colorectal resection (perc.)	155 (5.88%)	4,422 (6.19%)	0.95 (0.80, 1.12)	0.56	155 (5.88%)	1	0	1
Cholecystectomy (perc.)	378 (14.34%)	11,351 (15.88%)	0.89 (0.79, 0.99)	0.03	378 (14.34%)	1	0	1
Comorbidities (Elixhauser 38)
	Complications, n (%)	No Complications, n (%)	Odds Ratio (CI)	P-Value	No Complications, n (%)	Odds Ratio (CI)	SMD	P-Value
Acquired immune deficiency syndrome	.	.	1.07 (0.50, 2.28)	0.84	.	0.87 (0.32, 2.42)	-0.007	> 0.99
Alcohol abuse	75 (2.85%)	1,168 (1.63%)	1.76 (1.39, 2.23)	< 0.01	83 (3.15%)	0.90 (0.66, 1.24)	-0.018	0.57
Deficiency anemias	577 (21.89%)	9,054 (12.67%)	1.93 (1.76, 2.12)	< 0.01	614 (23.29%)	0.92 (0.81, 1.05)	-0.034	0.24
Autoimmune conditions	124 (4.7%)	3,427 (4.8%)	0.98 (0.82, 1.18)	0.89	132 (5.01%)	0.94 (0.73, 1.20)	-0.014	0.65
Chronic blood loss anemia	50 (1.9%)	775 (1.08%)	1.76 (1.32, 2.35)	< 0.01	54 (2.05%)	0.92 (0.63, 1.36)	-0.011	0.77
Leukemia	21 (0.8%)	344 (0.48%)	1.66 (1.07, 2.58)	0.03	19 (0.72%)	1.11 (0.59, 2.06)	0.009	0.87
Lymphoma	16 (0.61%)	388 (0.54%)	1.12 (0.68, 1.85)	0.59	21 (0.8%)	0.76 (0.40, 1.46)	-0.023	0.51
Metastatic cancer	241 (9.14%)	2,296 (3.21%)	3.03 (2.64, 3.48)	< 0.01	251 (9.52%)	0.96 (0.79, 1.15)	-0.013	0.67
Solid tumor without metastasis, in situ	.	.	0.93 (0.13, 6.87)	> 0.99	.	0.50 (0.05, 5.52)	-0.016	> 0.99
Solid tumor without metastasis, malignant	123 (4.67%)	1,614 (2.26%)	2.12 (1.76, 2.56)	< 0.01	102 (3.87%)	1.22 (0.93, 1.59)	0.039	0.17
Cerebrovascular disease	137 (5.2%)	1,862 (2.61%)	2.05 (1.72, 2.45)	< 0.01	134 (5.08%)	1.02 (0.80, 1.31)	0.005	0.9
Coagulopathy	224 (8.5%)	2,257 (3.16%)	2.85 (2.47, 3.29)	< 0.01	207 (7.85%)	1.09 (0.89, 1.33)	0.024	0.42
Dementia	360 (13.66%)	6,501 (9.1%)	1.58 (1.41, 1.77)	< 0.01	377 (14.3%)	0.95 (0.81, 1.11)	-0.019	0.53
Depression	349 (13.24%)	9,854 (13.79%)	0.95 (0.85, 1.07)	0.44	357 (13.54%)	0.97 (0.83, 1.14)	-0.009	0.78
Diabetes with chronic complications	463 (17.56%)	7,037 (9.85%)	1.95 (1.76, 2.16)	< 0.01	481 (18.25%)	0.95 (0.83, 1.10)	-0.018	0.54
Diabetes without chronic complications	293 (11.12%)	9,697 (13.57%)	0.80 (0.70, 0.90)	< 0.01	294 (11.15%)	1.00 (0.84, 1.18)	-0.001	> 0.99
Drug abuse	31 (1.18%)	696 (0.97%)	1.21 (0.84, 1.74)	0.31	25 (0.95%)	1.24 (0.73, 2.11)	0.022	0.5
Heart failure	678 (25.72%)	6,526 (9.13%)	3.45 (3.15, 3.77)	< 0.01	684 (25.95%)	0.99 (0.87, 1.12)	-0.005	0.87
Hypertension, complicated	963 (36.53%)	12,430 (17.39%)	2.73 (2.52, 2.97)	< 0.01	965 (36.61%)	1.00 (0.89, 1.11)	-0.002	0.98
Hypertension, uncomplicated	1,038 (39.38%)	38,798 (54.29%)	0.55 (0.51, 0.59)	< 0.01	1,069 (40.55%)	0.95 (0.85, 1.06)	-0.024	0.4
Liver disease, mild	142 (5.39%)	2,693 (3.77%)	1.45 (1.22, 1.73)	< 0.01	143 (5.42%)	0.99 (0.78, 1.26)	-0.002	> 0.99
Liver disease, moderate to severe	27 (1.02%)	223 (0.31%)	3.31 (2.21, 4.94)	< 0.01	21 (0.8%)	1.29 (0.73, 2.29)	0.024	0.47
Chronic pulmonary disease	758 (28.76%)	13,417 (18.77%)	1.75 (1.60, 1.90)	< 0.01	776 (29.44%)	0.97 (0.86, 1.09)	-0.015	0.61
Neurological disorders affecting movement	110 (4.17%)	2,728 (3.82%)	1.10 (0.90, 1.33)	0.35	111 (4.21%)	0.99 (0.76, 1.30)	-0.002	> 0.99
Other neurological disorders	111 (4.21%)	1,207 (1.69%)	2.56 (2.10, 3.12)	< 0.01	109 (4.14%)	1.02 (0.78, 1.34)	0.004	0.95
Seizures and epilepsy	104 (3.95%)	1,498 (2.1%)	1.92 (1.57, 2.35)	< 0.01	94 (3.57%)	1.11 (0.84, 1.48)	0.020	0.51
Obesity	419 (15.9%)	11,997 (16.79%)	0.94 (0.84, 1.04)	0.23	420 (15.93%)	1.00 (0.86, 1.16)	-0.001	> 0.99
Paralysis	35 (1.33%)	410 (0.57%)	2.33 (1.65, 3.30)	< 0.01	31 (1.18%)	1.13 (0.70, 1.84)	0.014	0.71
Peripheral vascular disease	254 (9.64%)	3,409 (4.77%)	2.13 (1.86, 2.43)	< 0.01	246 (9.33%)	1.04 (0.86, 1.25)	0.010	0.74
Psychoses	91 (3.45%)	1,694 (2.37%)	1.47 (1.19, 1.83)	< 0.01	80 (3.03%)	1.14 (0.84, 1.55)	0.024	0.44
Pulmonary circulation disease	186 (7.06%)	1,707 (2.39%)	3.10 (2.65, 3.63)	< 0.01	167 (6.34%)	1.12 (0.90, 1.39)	0.029	0.32
Renal failure, moderate	467 (17.72%)	7,239 (10.13%)	1.91 (1.72, 2.12)	< 0.01	500 (18.97%)	0.92 (0.80, 1.06)	-0.032	0.25
Renal failure, severe	192 (7.28%)	1,877 (2.63%)	2.91 (2.50, 3.40)	< 0.01	177 (6.71%)	1.09 (0.88, 1.35)	0.022	0.45
Hypothyroidism	525 (19.92%)	14,266 (19.96%)	1.00 (0.90, 1.10)	0.98	536 (20.33%)	0.97 (0.85, 1.11)	-0.010	0.73
Other thyroid disorders	28 (1.06%)	764 (1.07%)	0.99 (0.68, 1.45)	> 0.99	20 (0.76%)	1.40 (0.79, 2.50)	0.032	0.31
Peptic ulcer with bleeding	43 (1.63%)	490 (0.69%)	2.40 (1.75, 3.29)	< 0.01	43 (1.63%)	1.00 (0.65, 1.53)	0.000	> 0.99
Valvular disease	297 (11.27%)	3,821 (5.35%)	2.25 (1.98, 2.55)	< 0.01	292 (11.08%)	1.02 (0.86, 1.21)	0.006	0.86
Weight loss	454 (17.22%)	2,933 (4.1%)	4.86 (4.37, 5.41)	< 0.01	432 (16.39%)	1.06 (0.92, 1.23)	0.022	0.44
Abbreviations: n (%), count (percentage); CI, 95% confidence interval; Mean Diff: Difference in means; SMD, Standardized mean difference; perc.: Percutaneous. Notes: Age units are years. Variables 0-64, 65-69, 70-74, 75-79, 80-84, 85+ represent age categories. Claims with complications remain the same in both: the full, and the matched dataset. P-Values correspond to the Student's t-statistic for…

## Sheet: TA2 Balance diagnostics
Table A2. Matched dataset balance diagnostics. Standardized mean differences. No complications (control) versus complications.
Procedure Group	Age	Elixhauser Comorbidity Count	Elixhauser Comorbidity Index (Mortality)	Elixhauser Comorbidity Index (Re-admission)	Female	Male	0-64	65-69	70-74	75-79	80-84	85+	Urgent	Elective
All procedures†	-0.027	-0.012	0.019	0.001	0.008	-0.008	0.021	0.019	0.010	-0.010	0.009	-0.036	-0.020	0.017
Cholecystectomy	-0.049	0.011	0.001	0.008	0.004	-0.004	0.012	0.063	-0.013	-0.030	0.005	-0.029	0.005	-0.020
Colorectal resection†	-0.038	-0.021	0.001	-0.001	-0.020	0.020	0.025	0.000	0.053	-0.044	0.030	-0.057	-0.004	0.004
Hip replacement†	-0.016	-0.005	0.052	0.003	0.042	-0.042	0.010	0.037	-0.026	0.029	-0.006	-0.027	-0.060	0.061
Hysterectomy	0.045	-0.057	0.008	-0.014	-	-	0.095	-0.053	-0.025	0.066	-0.038	-0.041	0.053	-0.053
Knee arthroplasty	0.013	-0.093	0.036	-0.018	0.000	0.000	0.059	-0.058	0.000	0.060	0.000	-0.033	-0.071	0.071
Colorectal resection open approach†	-0.035	-0.023	0.005	-0.000	-0.021	0.021	0.022	0.016	0.051	-0.053	0.026	-0.055	-0.003	0.003
Cholecystectomy open approach	-0.064	-0.052	0.012	0.035	-0.049	0.049	-0.091	0.047	0.000	0.000	0.046	0.000	0.073	-0.091
Colorectal resection percutaneous	-0.034	-0.011	-0.030	-0.004	-0.013	0.013	0.025	-0.082	0.066	0.000	0.055	-0.049	-0.013	0.013
Cholecystectomy percutaneous†	-0.062	0.025	-0.001	0.000	-0.005	0.005	0.037	0.099	-0.006	-0.042	-0.015	-0.053	-0.045	0.038
Notes: Standardized mean differences (SMD) calculated using Cohen's D formula. An absolute SMD value less than 0.1 in each and all of these variables was used to determine balance. Variables 0-64, 65-69, 70-74, 75-79, 80-84, 85+ represent age categories. † Denotes that an absolute SMD value less than 0.1 was also met for all of the 38 individual Elixhauser comorbidities.

## Sheet: TA3 ICD-10 codes
Table A3. Procedures and diagnoses (i.e., complications) groups, ICD10 codes and counts
Procedures
Procedure Group	ICD10-PCS, Code (number of cases)
Cholecystectomy	0FT44ZZ* (11,640), 0FT40ZZ† (1,494), 0FJB8ZZ (308), 0F9930Z (215), 0FB44ZZ* (78), 0FB40ZZ† (51), 0F9630Z (40), 0F9530Z (36), 0FC90ZZ† (.), 0F9940Z* (.), 0FJB3ZZ (.), 0F9830Z (.), 0F9970Z (.), 0FC80ZZ† (.), 0FJB4ZZ* (.), 0FHB3DZ (.), 0FJB0ZZ† (.), 0F9580Z (.), 0F9680Z (.), 0FB43ZZ (.), 0F9640Z* (.), 0F968ZZ (.)
Colorectal resection	0DTF0ZZ† (2,938), 0DTF4ZZ* (2,165), 0DTN0ZZ† (2,083), 0DTN4ZZ* (1,269), 0DTG0ZZ† (484), 0DTP0ZZ† (337), 0DBP0ZZ† (298), 0D1N4Z4* (287), 0D1N0Z4† (281), 0DTH0ZZ† (250), 0DBE0ZZ† (240), 0DTE0ZZ† (207), 0DTG4ZZ* (196), 0DTL0ZZ† (188), 0DTP4ZZ* (167), 0DTK0ZZ† (164), 0DBP4ZZ* (149), 0DTH4ZZ* (110), 0DTL4ZZ* (95), 0DBE4ZZ* (70), 0DTE4ZZ* (69), 0DBE8ZZ (34), 0DTP7ZZ (33), 0DTN8ZZ (11), 0DTF8ZZ (.), 0DT…
Hip replacement	0SR902A (2,965), 0SRB02A (2,516), 0SR90JZ (2,294), 0SR90JA (2,165), 0SRB0JZ (1,935), 0SRB0JA (1,830), 0SRS0JZ (1,723), 0SRR0JZ (1,706), 0SRS0J9 (1,679), 0SRS0JA (1,570), 0SRR0J9 (1,569), 0SRR0JA (1,478), 0SR902Z (1,286), 0SRB02Z (1,143), 0SRS01A (966), 0SR903A (898), 0SRR01A (874), 0SRR019 (697), 0SRS019 (691), 0SR903Z (686), 0SRB03A (686), 0SRB03Z (543), 0SR901A (481), 0SRS01Z (465), 0SR90J9 (46…
Hysterectomy	0UT90ZZ (1,771), 0UT94ZZ (577), 0UT9FZZ (367), 0UT97ZZ (339), 0UTC0ZZ (20), 0UT98ZZ (18), 0UTC4ZZ (.), 0UTC7ZZ (.), 0UTC8ZZ (.)
Knee arthroplasty	0SPC0JZ (1,162), 0SPD0JZ (1,040), 0SRC0JZ (746), 0SRD0JZ (691), 0SPC09Z (517), 0SPD09Z (473), 0QSF04Z (259), 0QSD04Z (191), 0SBD4ZZ (186), 0SBC0ZZ (185), 0SBC4ZZ (185), 0SBD0ZZ (175), 0SWC0JZ (67), 0SWD0JZ (55), 0SUW09Z (49), 0SUV09Z (46), 0SRV0JZ (37), 0SRW0JZ (24), 0SUD09C (23), 0SQD0ZZ (19), 0SUC09C (18), 0SQC0ZZ (15), 0QRD0JZ (14), 0MQN0ZZ (13), 0SRT0JZ (11), 0KXS0ZZ (.), 0SRU0JZ (.), 0QRF0JZ…
Complication Diagnoses
Complications Group	ICD10-CM, Code (number of cases)
Cardiac arrest	I46.9 (152)
Myocardial infarction	I21.4 (215), I21.A1 (79), I21.3 (13), I21.9 (11), I21.09 (.), I21.19 (.), I21.29 (.)
PE and DVT	I26.99 (180), T81.718A (21), T81.72XA (.), T82.818A (.), I82.409 (.), I82.439 (.), I82.4Z9 (.), I26.92 (.), I80.9 (.), I82.619 (.), I82.629 (.), I82.609 (.), I82.B19 (.), I82.290 (.), I82.890 (.)
Pneumonia	J18.9 (709), J15.6 (43), J18.1 (28), J15.9 (27), J15.1 (19), J15.0 (16), J95.851 (13), J15.212 (11), J15.4 (.), J15.20 (.), J15.211 (.), J15.8 (.), J15.5 (.), B01.2 (.), J12.1 (.), J12.89 (.), J12.3 (.), J12.9 (.), J13 (.), J14 (.), J16.8 (.), J18.0 (.), J18.8 (.), J11.00 (.)
Sepsis	A41.9 (878), R65.21 (463), R57.1 (159), R65.20 (108), T81.19XA (105), R57.8 (87), T81.44XA (46), A41.51 (38), T81.12XA (38), A41.59 (24), A41.89 (21), A41.50 (19), A41.81 (18), T81.10XA (13), A41.01 (12), A41.02 (.), A41.1 (.), A41.52 (.), A40.9 (.), A40.0 (.), A40.8 (.), A41.4 (.), A41.53 (.)
Site infection	T81.41XA (37), T83.511A (29), T81.43XA (26), T81.49XA (18), T81.40XA (16), T85.79XA (.), T82.7XXA (.), K68.11 (.), T83.518A (.), T81.42XA (.)
Stroke	I63.40 (14), I63.22 (.), I63.50 (.), I60.8 (.), I61.9 (.), I61.8 (.), I62.00 (.), I62.01 (.), I62.9 (.)
Abbreviations: ICD10, International Classification of Diseases 10th edition; PCS, Procedure Coding System; CM, Clinical Modification; PE and DVT, pulmonary embolism and deep vein thrombosis. Notes: Values in parenthesis represent the occurrence count of the code in the dataset. * denotes the procedure code is included in the "percutaneous" subgroup. † denotes the procedure code is included in the…

## Sheet: TA4 Complication comparison
Table A4. Comparison of Study complication rates to ACS NSQIP average risk of any and serious complications
Procedure in Paper	CPT code in ACS NSQIP calculator	Study Complication Rate	ACS NSQIP Average risk of any complication	ACS NSQIP Average risk of serious complication
Knee Arthroplasty	27442 - Arthroplasty, knee, femoral condyles or tibial plateau(s), knee;	0.014	0.026	0.023
Knee Arthroplasty	27447 - Arthroplasty, knee, condyle and plateau; medial and lateral compartments with or without patella resurfacing (total knee arthroplasty)	0.014	0.039	0.03
Hip Replacement	27130 - Arthroplasty, acetabular and proximal femoral prosthetic replacement (total hip arthroplasty), with or without autograft or allograft	0.024	0.039	0.033
Hip Replacement	27132 - Conversion of previous hip surgery to total hip arthroplasty, with or without autograft or allograft	0.024	0.085	0.075
Hysterectomy	58150 - Total abdominal hysterectomy (corpus and cervix), with or without removal of tube(s), with or without removal of ovary(s);	0.0284	0.075	0.057
Hysterectomy	58260 - Vaginal hysterectomy, for uterus 250 g or less;	0.0284	0.06	0.059
Cholecystectomy (Percutaneous)	47562 - Laparoscopy, surgical; cholecystectomy	0.0322	0.029	0.023
Cholecystectomy (Percutaneous)	47564 - Laparoscopy, surgical; cholecystectomy with exploration of common duct	0.0322	0.052	0.045
Cholecystectomy (Open)	47600 - Cholecystectomy;	0.0783	0.149	0.11
Cholecystectomy (Open)	47610 - Cholecystectomy with exploration of common duct;	0.0783	0.17	0.12
Colorectal resection (Percutaneous)	44204 - Laparoscopy, surgical; colectomy, partial, with anastomosis	0.0339	0.091	0.077
Colorectal resection (Percutaneous)	44140 - Colectomy, partial; with anastomosis	0.1146	0.225	0.178
Abbreviations: CPT: Current Procedural Terminology: ACS: American College of Surgeons; NSQIP: National Surgical Quality Improvement Program.
